# Supplementary material
Source: PubMed Central journal article supplement (PMC4486635)
Supplement: NIHMS691999-supplement-Supp_FigureS1-S3.pdf [file NIHMS691999-supplement-Supp_FigureS1-S3.pdf]

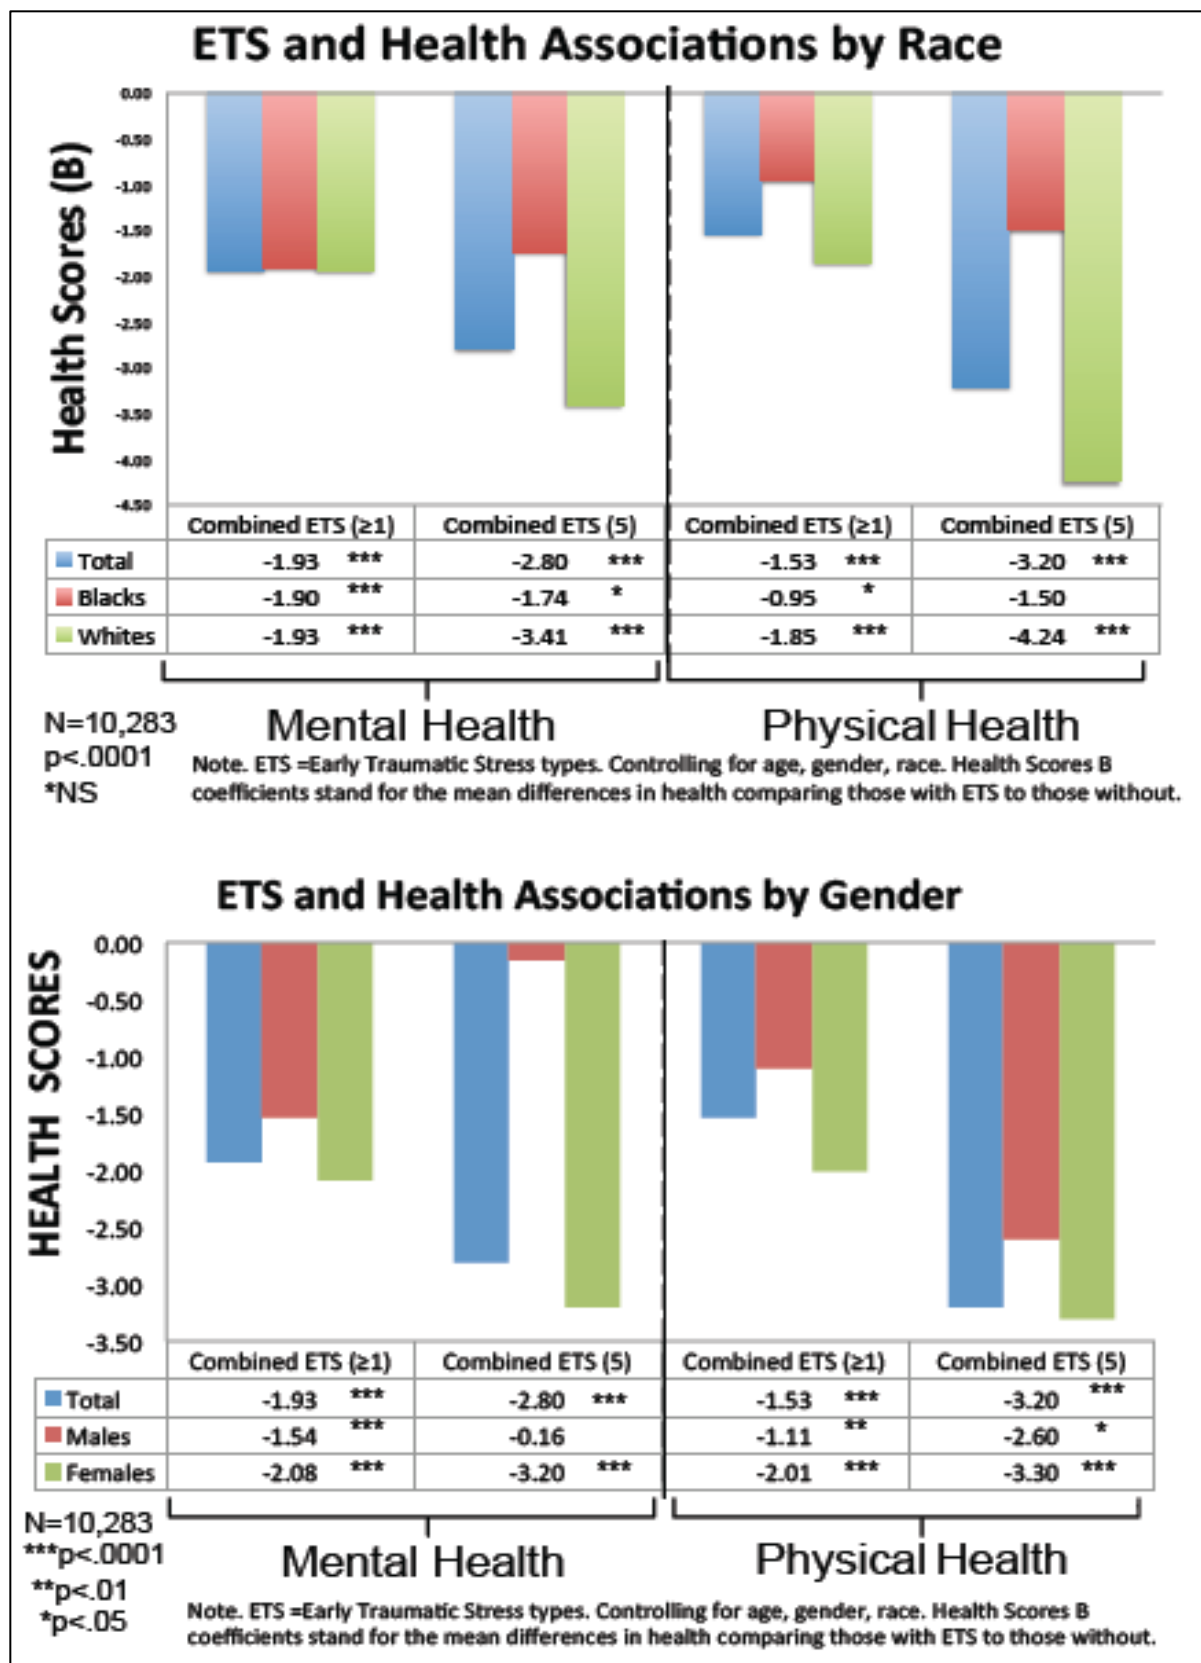

Figure 1: ETS and Health Associations by Race and Gender

## Religious Involvement effects on Health

N=10,283

\*\* p<.01

\*\*\*p<.0001

Note. Controlling for age,  
gender, race, income,  
Education.

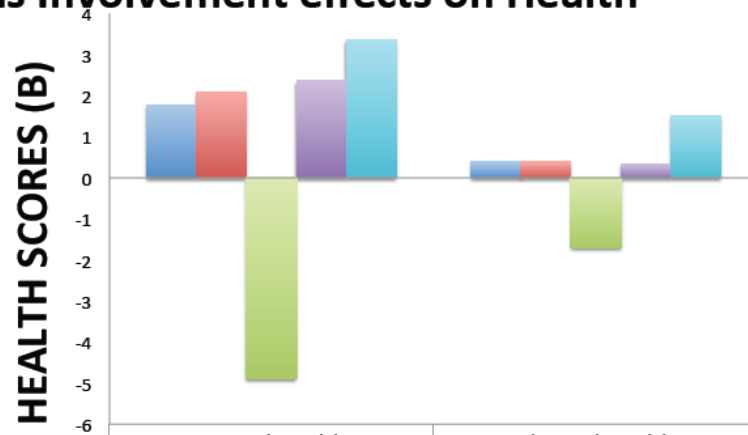

|                           | Mental Health Score (B) | Physical Health Score (B) |
|---------------------------|-------------------------|---------------------------|
| Intrinsic Religiosity     | 1.78 ***                | 0.39 ***                  |
| Positive Religious Coping | 2.08 ***                | 0.4 **                    |
| Negative Religious Coping | -4.89 ***               | -1.7 ***                  |
| Forgiveness               | 2.36 **                 | 0.34 **                   |
| Gratitude                 | 3.36 ***                | 1.5 ***                   |

Figure 2: Religious Involvement and Health Associations

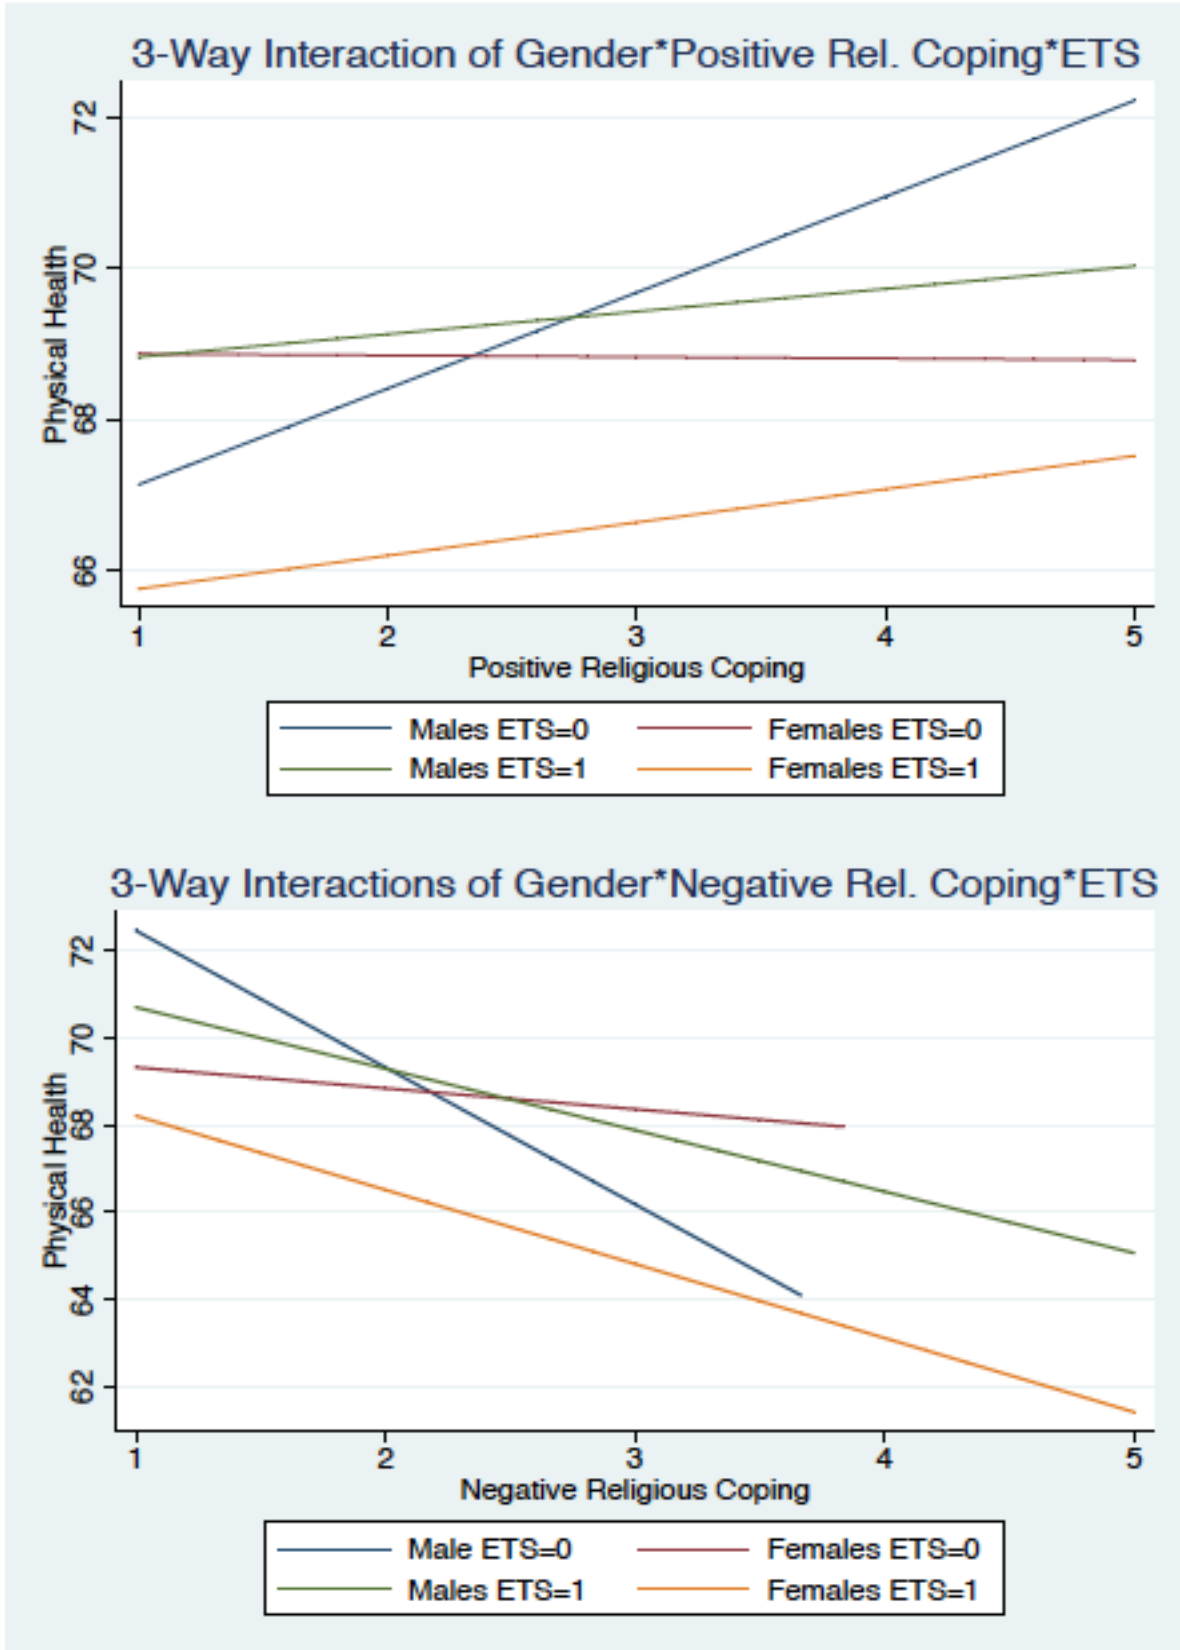

**Figure 3: Gender Variation of RI moderation of ETS on Health**  
 Note: ETS=1 denotes exposure to ETS and ETS=0 denotes no exposure
