# Supplementary material
Source: PubMed Central journal article supplement (PMC4486635)
Supplement: NIHMS691999-supplement-Supp_Tables.pdf [file NIHMS691999-supplement-Supp_Tables.pdf]

**Table 2: Multiple Regression Results for Effects of ETS on Health**

| EARLY TRAUMATIC STRESS <sup>a</sup> AND HEALTH OUTCOMES |               |                |                |               |                  |                |                  |                |                 |               |
|---------------------------------------------------------|---------------|----------------|----------------|---------------|------------------|----------------|------------------|----------------|-----------------|---------------|
| <i>MENTAL HEALTH</i>                                    | ALL (N=10283) |                | MALES (n=3333) |               | FEMALES (n=6946) |                | BLACKS (n= 3749) |                | WHITES (n=6530) |               |
|                                                         | <i>B</i>      | <i>95% CI</i>  | <i>B</i>       | <i>95% CI</i> | <i>B</i>         | <i>95% CI</i>  | <i>B</i>         | <i>95% CI</i>  | <i>B</i>        | <i>95% CI</i> |
| Early Traumatic Stress <sup>1</sup>                     | -1.93***      | [-2.31,-1.56]  | -1.54***       | [-2.13, -.96] | -2.08***         | [-2.57, -.160] | -1.90***         | [-2.60, -1.20] | -1.93***        | [-2.38,-1.47] |
| Early Traumatic Stress <sup>2</sup>                     | -1.64***      | [-2.06,-1.24]  | -1.40***       | [-2.00, -.78] | -1.76***         | [-2.3, -1.21]  | -1.67***         | [-2.38, -.95]  | -1.67***        | [-2.16,-1.17] |
| ETS (all 5 types) <sup>1</sup>                          | -2.80***      | [-3.64,-1.95]  | -.16           | [-2.11, 1.79] | -3.20***         | [-4.14, -2.26] | -1.74*           | [-3.16, -.32]  | -3.41***        | [-4.45,-2.37] |
| ETS (all 5 types) <sup>2</sup>                          | -2.38***      | [-3.12, -1.64] | .05            | [-1.92, 2.01] | -3.16***         | [-4.16, -2.15] | -1.69*           | [-3.12, -.27]  | -3.24***        | [-4.33,-2.15] |
| <i>PHYSICAL HEALTH</i>                                  |               |                |                |               |                  |                |                  |                |                 |               |
| Early Traumatic Stress <sup>1</sup>                     | -1.53***      | [-1.97,-1.08]  | -1.11**        | [-1.80, -.43] | -2.01***         | [-2.57, -1.60] | -.95*            | [-1.73,-.17]   | -1.85***        | [-2.40,-1.30] |
| Early Traumatic Stress <sup>2</sup>                     | -1.02***      | [-1.50,-.55]   | -.81*          | [-1.52, -.11] | -1.17***         | [-1.80, -.54]  | -.62             | [-1.38, .15]   | -1.37***        | [-1.94,-.80]  |
| ETS (all 5 types) <sup>1</sup>                          | -3.20***      | [-4.18,-2.22]  | -2.60*         | [-4.90, -.29] | -3.30***         | [-4.42, -2.19] | -1.50            | [-3.09, .10]   | -4.24***        | [-5.49,-2.99] |
| ETS (all 5 types) <sup>2</sup>                          | -2.51***      | [-3.52,-1.51]  | -1.91          | [-4.21, .40]  | -2.60***         | [-3.78, -1.42] | -1.20            | [-2.75, .35]   | -3.70***        | [-4.97,-2.43] |

Note. Multiple imputation data used to account for missing variables of mental and physical health (5 imputations applied). B= Raw unstandardized coefficients.

<sup>a</sup> Early traumatic stress (ETS) refers to exposure to one or more of: child abuse (CA) physical/emotional/sexual abuse, neglect and/or witnessed abuse

<sup>1</sup> Controlled for age (added race for all male/female related regressions, and gender for all Black/White related regressions)

<sup>2</sup> Controlled for age, income self (last 12 months), education (fruit intake included for physical health only)

\* $p < .05$  \*\* $p < .01$  \*\*\* $p < .0001$

**Table 3: Demographics by Gender and Race**

| <b>VARIABLES</b>                           | <u>ALL</u><br>N=10283<br>n(%) | <u>All Males</u><br>n=3333<br>(32) | <u>All Females</u><br>n=6946<br>(68) | <u>All Blacks</u><br>n=3749<br>(36) | <u>All Whites</u><br>n=6530<br>(64) |
|--------------------------------------------|-------------------------------|------------------------------------|--------------------------------------|-------------------------------------|-------------------------------------|
| <b>Age***</b><br>Mean (SD) Year            | 62 (14) <sup>a</sup>          | 63 (14) <sup>b</sup>               | 61(14) <sup>a</sup>                  | 58 (13) <sup>c</sup>                | 64 (14) <sup>a</sup>                |
| <b>Education***</b>                        |                               |                                    |                                      |                                     |                                     |
| • • • • •                                  | 2441 (24)                     | 697 (21)                           | 1746 (26)                            | 912 (26)                            | 1525 (23)                           |
| school                                     | 2237 (22)                     | 586 (18)                           | 1651 (24)                            | 790 (21)                            | 1447 (22)                           |
| Some College                               | 3403 (33)                     | 995 (30)                           | 2409 (35)                            | 1193 (32)                           | 2210 (34)                           |
| College degree                             | 2085 (21)                     | 1039 (31)                          | 1047 (15)                            | 771 (21)                            | 1314 (20)                           |
| • • • • • • • •                            |                               |                                    |                                      |                                     |                                     |
| <b>Income***</b><br>(Self- past 12 months) |                               |                                    |                                      |                                     |                                     |
| <\$10K (1)                                 | 5353 (17)                     | 178 (6)                            | 1530 (23)                            | 567 (16)                            | 1139 (18)                           |
| \$11-20K (2)                               | 1987 (20)                     | 478 (14)                           | 1509 (23)                            | 644 (18)                            | 1343 (22)                           |
| \$21-30K (3)                               | 1660 (17)                     | 549 (17)                           | 1111 (17)                            | 644 (18)                            | 1016 (16)                           |
| \$31-50K (4)                               | 2159 (22)                     | 855 (27)                           | 1304 (20)                            | 863 (24)                            | 1296 (21)                           |
| \$51-75K (5)                               | 1233 (13)                     | 578 (18)                           | 656 (10)                             | 504 (14)                            | 729 (12)                            |
| \$76-100K (6)                              | 532 (5)                       | 263 (8)                            | 269 (4)                              | 219 (6)                             | 313 (5)                             |
| >\$101K (7)                                | 508 (5)                       | 330 (10)                           | 178 (3)                              | 145 (4)                             | 363 (6)                             |

<sup>a</sup>Age Range=30-106; <sup>b</sup>Age Range=30-101; <sup>c</sup>Age Range=30-99  
Age compared using *t-test*: Gender (10105)=4.8 \*\*\**p*<.0001; Race (10107)= -21.1 \*\*\**p*<.0001  
Education comparison: *Pearson Chi<sup>2</sup>* Gender (10162)=590.4 \*\*\**p*<.0001; Race (10166)=175.9 \*\*\**p*<.0001  
Income comparison: *Pearson Chi<sup>2</sup>* Gender (9782)=919.2 \*\*\**p*<.0001; Race (9785) =75.0 \*\*\**p*<.0001

**Table 4: Descriptive Statistics of Religious Involvement by gender and race**

| <b>RELIGIOUS VARIABLES<br/>(Range)</b>  | <b>ALL<br/>(N=10283)</b> |           | <b>MALES ***<br/>(n=3333)</b> |           | <b>FEMALES ***<br/>(n=6946)</b> |           | <b>BLACKS ***<br/>(n=3749)</b> |           | <b>WHITES***<br/>(n=6530)</b> |           |
|-----------------------------------------|--------------------------|-----------|-------------------------------|-----------|---------------------------------|-----------|--------------------------------|-----------|-------------------------------|-----------|
|                                         | <i>Mean</i>              | <i>SD</i> | <i>Mean</i>                   | <i>SD</i> | <i>Mean</i>                     | <i>SD</i> | <i>Mean</i>                    | <i>SD</i> | <i>Mean</i>                   | <i>SD</i> |
| Religious Involvement                   |                          |           |                               |           |                                 |           |                                |           |                               |           |
| Intrinsic Religiosity (IR, 1-7)         | 6.19                     | 1.07      | 6.42                          | .89       | 6.47                            | .86       | 6.28                           | 1.00      |                               |           |
| Positive Religious Coping<br>(+RC, 1-5) | 4.05                     | .76       | 4.15                          | .68       | 4.27                            | .63       | 4.03                           | .74       |                               |           |
| Negative Religious<br>Coping (-RC, 1-5) | 1.45                     | .50       | 1.41                          | .52       | 1.45                            | .56       | 1.40                           | .48       |                               |           |
| Forgiveness (1-7)                       | 6.17 <sup>a</sup>        | .94       | 6.18 <sup>a</sup>             | .95       | 6.24                            | .94       | 6.14                           | 1.00      |                               |           |
| Gratitude (1-7)                         | 6.22                     | .77       | 6.36                          | .73       | 6.41                            | .68       | 6.26                           | .78       |                               |           |

Note. Each religious involvement variable was compared using *t-test*: Gender (males,females) \*\*\* $p < .0001$ ; Race (Black,White) \*\*\* $p < .0001$

<sup>a</sup> No statistical significant difference by gender – all those without the subscript were statistically significantly different.

**Table 5: Prevalence of Early Traumatic Stress and Health Scores**

| ETS Types                                    | N(%)           |                 |                  |                 |                 |
|----------------------------------------------|----------------|-----------------|------------------|-----------------|-----------------|
|                                              | <u>ALL (%)</u> | <u>Male(%)</u>  | <u>Female(%)</u> | <u>Black(%)</u> | <u>White(%)</u> |
| Physical Abuse                               | 3776 (38)      | 1236(38)        | 2540(38)         | 1692(48)***     | 2084(33)***     |
| Emotional Abuse                              | 3701 (37)      | 1123(35)***     | 2578(39)***      | 1552(44)**      | 2150(34)***     |
| Sexual Abuse                                 | 2258 (23)      | 389(12)***      | 1868(28)***      | 944(26)***      | 1314(21)***     |
| Neglect                                      | 2959 (29)      | 1067(21)***     | 1892(28)***      | 897(24)***      | 2062(32)***     |
| Witness Abuse (Parental)                     | 2843 (28)      | 853(26)**       | 1990(29)**       | 1153(31)***     | 1692(26)***     |
| Early Traumatic Stress<br>(One or more type) | 6719 (67)      | 2119(65)**      | 4600(69)**       | 2683(75)***     | 4039(64)***     |
| Early Traumatic Stress<br>(All types)        | 447 (5)        | 65(2)***        | 382(6)***        | 285(5)          | 162(5)          |
| <b>Health Outcome<br/>(Mean, SD)</b>         | <b>N=9284</b>  | <b>(n=3081)</b> | <b>(n=6203)</b>  | <b>(n=3305)</b> | <b>(n=5979)</b> |
| Mental Health                                | 53(9)          | 53(8)**         | 53(9)**          | 53(9)           | 53(9)           |
| Physical Health                              | 48(11)         | 50(10)**        | 47(11)**         | 49(10)**        | 48(11)**        |

Note. ETS = early traumatic stress.

Mental Health comparison using t-tests *Gender* (9279)= 7.1; *race*(9282)= -0.1.

Physical Health comparison using t-test *Gender* (9279)=9.1; *race*(9282)=2.9.

ETS (any type) comparison using Pearson  $\chi^2$  *Gender* (9936)=19.6; *race*(9939)=121.2

ETS (all types) comparison using Pearson  $\chi^2$  *Gender* (9507)=72.2; *Race*( 9510)=.08

\* $p < .05$  \*\* $p < .01$  \*\*\* $p < .0001$

**Table 6: 3-Way Interactions of Religious Involvement and ETS by Gender and Race**

| <u>3-WAY INTERACTIONS BY GENDER</u> |          |           |               | <u>3-WAY INTERACTIONS BY RACE</u> |          |           |               |
|-------------------------------------|----------|-----------|---------------|-----------------------------------|----------|-----------|---------------|
| <u>MENTAL HEALTH</u>                | <u>B</u> | <u>SE</u> | <u>95% CI</u> | <u>MENTAL HEALTH</u>              | <u>B</u> | <u>SE</u> | <u>95% CI</u> |
| Gender-IR-ETS                       | -.39     | .42       | [-1.23, .44]  | Race-IR-ETS                       | -.71     | .47       | [-1.64, .22]  |
| Gender-PRC-ETS                      | -.56     | .55       | [-1.63, .52]  | Race-PRC-ETS                      | .01      | .62       | [-1.21, 1.23] |
| Gender-NRC-ETS                      | -.44     | .89       | [-2.14, 1.26] | Race-NRC-ETS                      | .84      | .85       | [-.83, 2.51]  |
| Gender-Forgiveness-ETS              | .21      | .44       | [-.66, 1.07]  | Race-Forgiveness-ETS              | -.18     | .44       | [-1.04, .67]  |
| Gender-Gratitude-ETS                | -.32     | .55       | [-1.45, .76]  | Race-Gratitude-ETS                | -.13     | .59       | [-1.29, 1.03] |
| <u>PHYSICAL HEALTH</u>              |          |           |               | <u>PHYSICAL HEALTH</u>            |          |           |               |
| Gender-IR-ETS                       | .93      | .50       | [-.18, 2.30]  | Race-IR-ETS                       | .15      | .56       | [-.94, 1.24]  |
| Gender-PRC-ETS                      | 1.43*    | .66       | [.14, 2.73]   | Race-PRC-ETS                      | -1.36    | .80       | [-2.93, .22]  |
| Gender-NRC-ETS                      | -2.95**  | 1.06      | [-5.03, -.87] | Race-NRC-ETS                      | .63      | 1.06      | [-1.45, 2.71] |
| Gender-Forgiveness-ETS              | .34      | .36       | [-.36, 1.05]  | Race-Forgiveness-ETS              | .25      | .55       | [-.82, 1.32]  |
| Gender-Gratitude-ETS                | .44      | .66       | [-.86, 1.74]  | Race-Gratitude-ETS                | -.66     | .72       | [-2.06, .75]  |

\*p<.05 \*\*p<.01 \*\*\*p<.0001

**Table 7: Moderation of Religious Involvement by Gender**

| MODERATION OF RELIGIOUS INVOLVEMENT <sup>a</sup> |                               |           |               |                                   |           |               |
|--------------------------------------------------|-------------------------------|-----------|---------------|-----------------------------------|-----------|---------------|
|                                                  | ALL MALES (3333) <sup>1</sup> |           |               | ALL FEMALES (n=6946) <sup>1</sup> |           |               |
| <i>MENTAL HEALTH</i>                             | <i>B</i>                      | <i>SE</i> | <i>95% CI</i> | <i>B</i>                          | <i>SE</i> | <i>95% CI</i> |
| ETS and Intrinsic Religiosity (IR)               | .71*                          | .30       | [.12, 1.29]   | .39                               | .29       | [-.16, .93]   |
| ETS and +Religious Coping (+RC)                  | .93*                          | .40       | [.15, 1.72]   | .42                               | .35       | [-.28, 1.11]  |
| ETS and - Religious Coping (-RC)                 | .33                           | .63       | [-.93, 1.55]  | -.23                              | .53       | [-1.26, .81]  |
| ETS and Forgiveness                              | .37                           | .23       | [-.85, .82]   | .31                               | .18       | [-.04, .66]   |
| ETS and Gratitude                                | 1.13**                        | .39       | [.37, 1.88]   | .67                               | .35       | [-.01, 1.36]  |
| <br><i>PHYSICAL HEALTH</i>                       |                               |           |               |                                   |           |               |
| ETS and Intrinsic Religiosity (IR)               | -.50                          | .35       | [-1.18, .19]  | .42                               | .33       | [-.24, 1.07]  |
| ETS and +Religious Coping (+RC)                  | <b>-.95*</b>                  | .47       | [-1.87, .04]  | .50                               | .43       | [-.34, 1.35]  |
| ETS and -Religious Coping (-RC)                  | <b>1.60*</b>                  | .80       | [.03, 3.17]   | <b>-1.28*</b>                     | .64       | [-2.53, -.03] |
| ETS and Forgiveness                              | .13                           | .27       | [-.40, .65]   | .47*                              | .22       | [.04, .90]    |
| ETS and Gratitude                                | .17                           | .47       | [-1.10, .76]  | .35                               | .43       | [-.49, 1.12]  |

Note. Multiple imputation data used to account for missing variables of mental and physical health (5 imputations applied).

B= Raw unstandardized coefficients.

<sup>1</sup>Statistically controlled for Age <sup>2</sup>Statistically controlled for, age, education, income (self)

<sup>a</sup> Interaction of early traumatic stress (ETS) and religious involvement variables

\* $p < .05$  \*\* $p < .01$  \*\*\* $p < .0001$
